# Supplementary material
Source: JCI journal article supplement (doi:10.1172/jci186062)

# Figure S1

## A

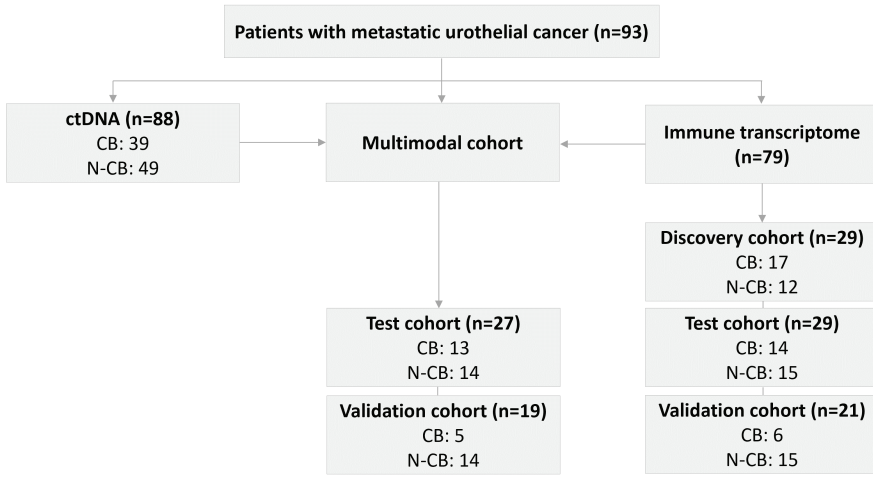

## B

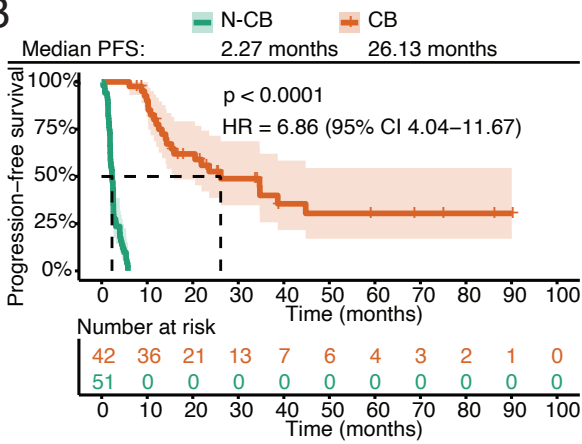

## C

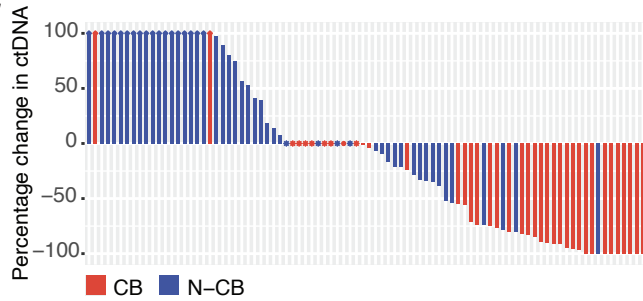

## D

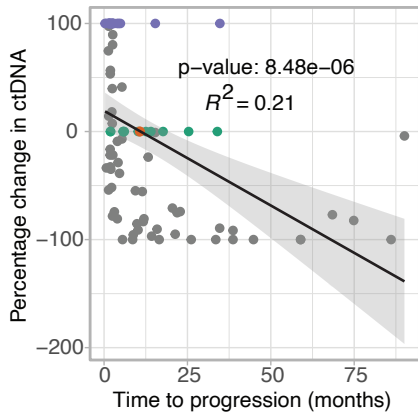

- percentage change >100
- undetected ctDNA
- no ctDNA change

## E

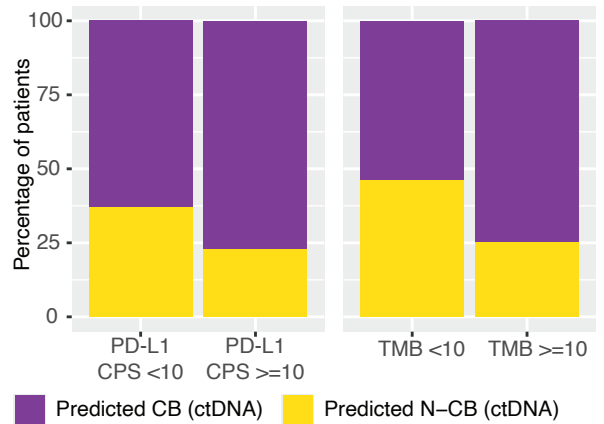

Figure S2

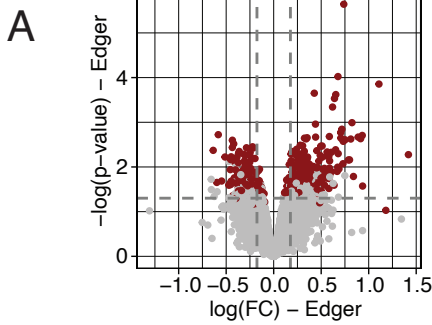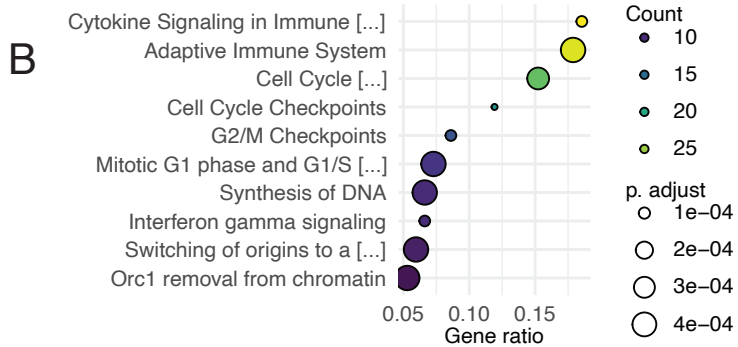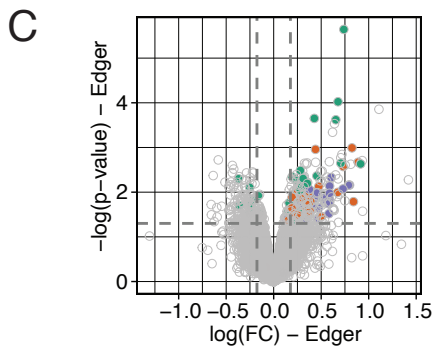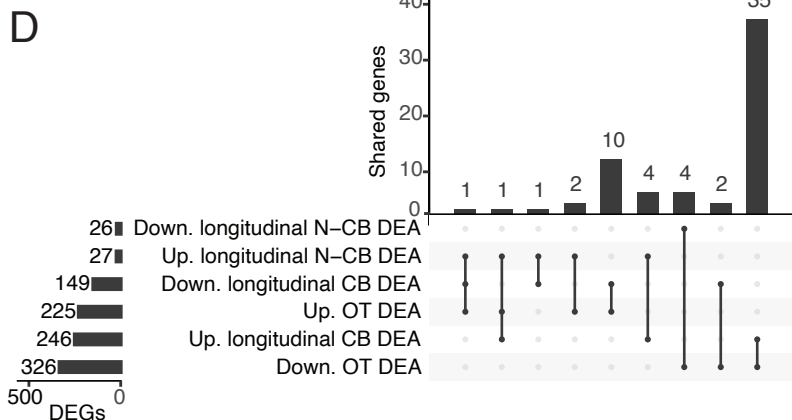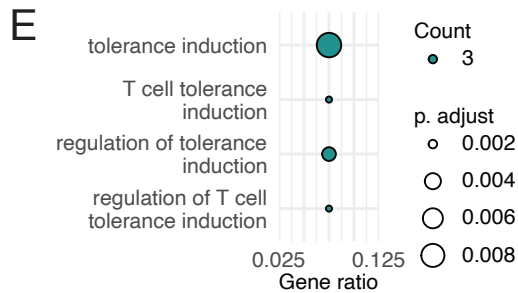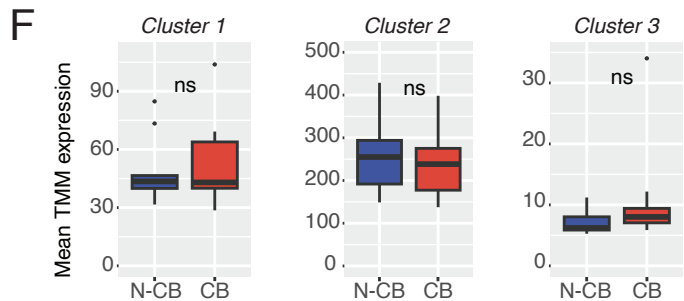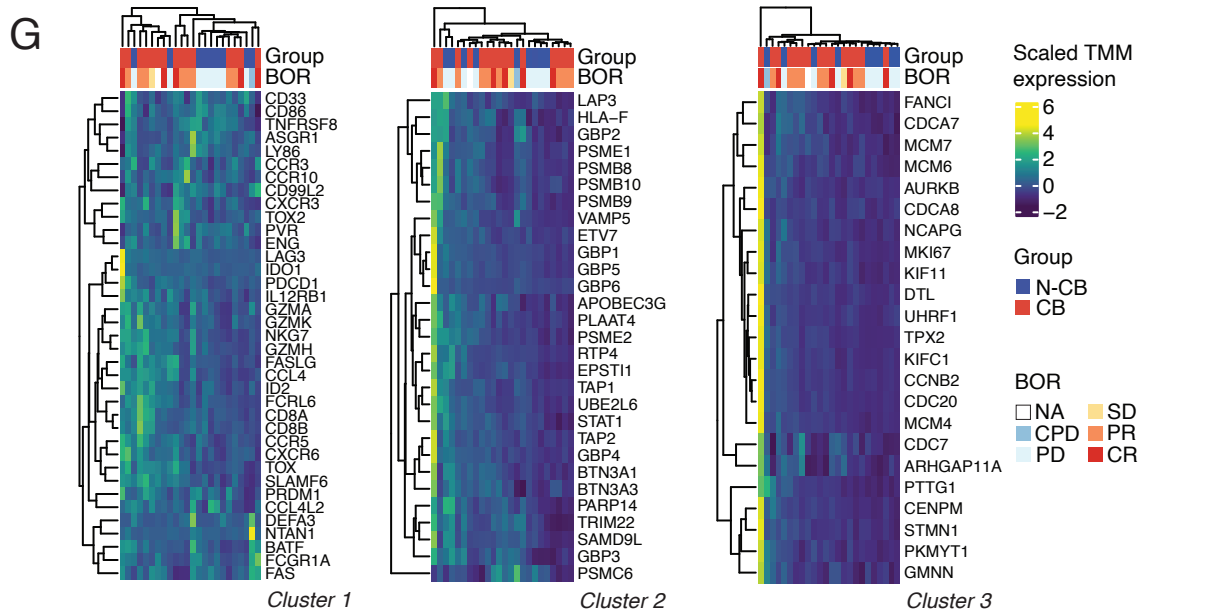

Figure S3

A

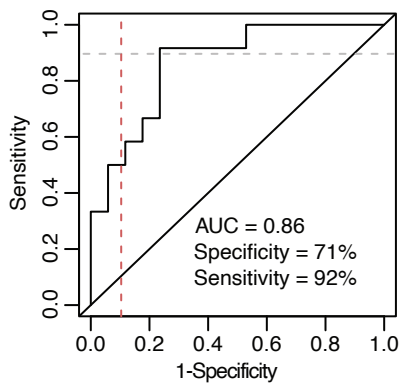

B

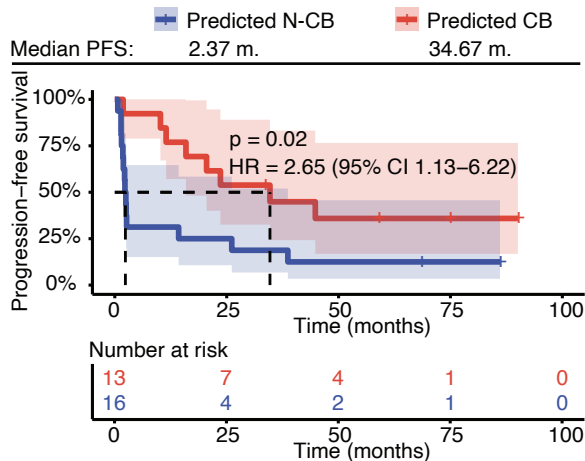

C

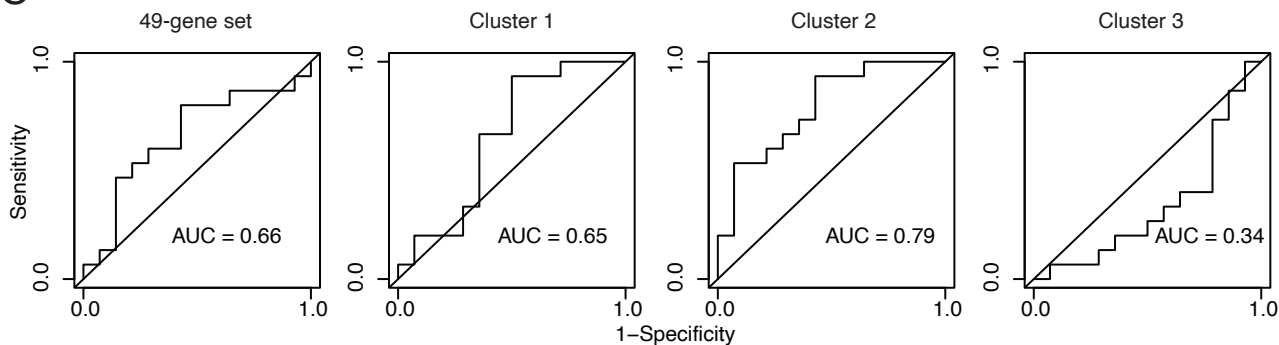

D

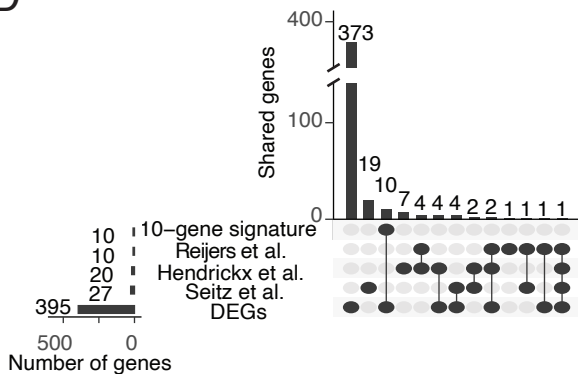

E

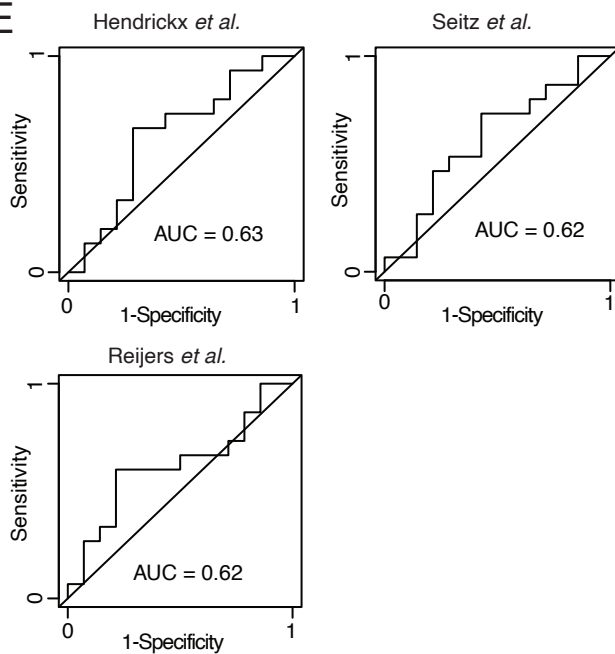

# Figure S4

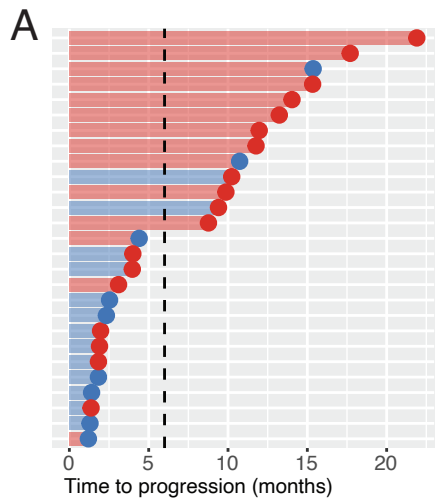

RNA model                      ctDNA model

- Predicted N-CB                      ● Predicted N-CB
- Predicted CB                        ● Predicted CB

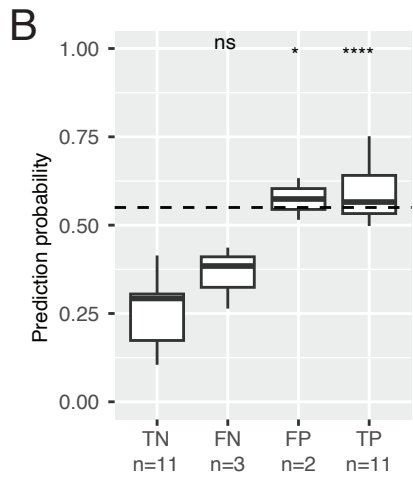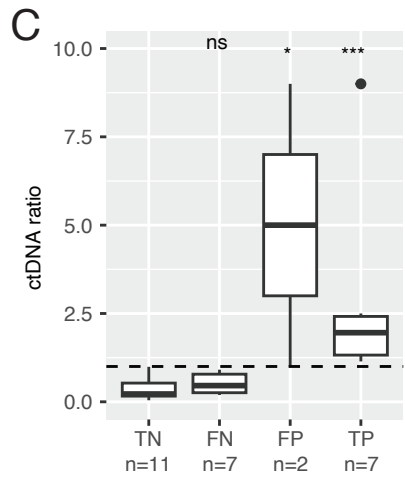

Supplement: sd1 [file 1]
